# Supplementary material for: A Fungal Transcription Regulator of Vacuolar Function Modulates Candida albicans Interactions with Host Epithelial Cells
Source: PubMed Central journal article supplement (PMC8593675; doi:10.1128/mbio.03020-21), 2021-11-16
Supplement: mbio.03020-21-st004.pdf [file mbio.03020-21-st004.pdf]

**Table S4.** *Candida albicans* strains used in this study.

| Name     | Parent | Genotype                                                                                                                                                                                          | Source                                 |
|----------|--------|---------------------------------------------------------------------------------------------------------------------------------------------------------------------------------------------------|----------------------------------------|
| JCP_398  | SN152  | $\frac{ura3\Delta::\lambda imm434::URA3-IRO1}{ura3\Delta::\lambda imm434} \frac{arg4::hisG\ his1::hisG\ leu2::hisG}{arg4::hisG\ his1::hisG\ leu2::hisG}$                                          | Noble and Johnson <i>et al.</i> , 2005 |
| JCP_738  | SN152  | $\frac{ura3\Delta::\lambda imm434::URA3-IRO1}{ura3\Delta::\lambda imm434} \frac{arg4::hisG\ his1::hisG\ leu2::hisG\ zcf8\Delta::CdHIS1}{arg4::hisG\ his1::hisG\ leu2::hisG\ zcf8\Delta::CmLEU2}$  | Homann <i>et al.</i> , 2009            |
| JCP_796  | SN152  | $\frac{ura3\Delta::\lambda imm434::URA3-IRO1}{ura3\Delta::\lambda imm434} \frac{arg4::hisG\ his1::hisG\ leu2::hisG\ zcf8\Delta::YFP}{arg4::hisG\ his1::hisG\ leu2::hisG\ ZCF8}$                   | This study                             |
| JCP_936  | SN152  | $\frac{ura3\Delta::\lambda imm434::URA3-IRO1}{ura3\Delta::\lambda imm434} \frac{arg4::hisG\ his1::hisG\ leu2::hisG\ zcf8\Delta::YFP}{arg4::hisG\ his1::hisG\ leu2::hisG\ zcf8\Delta::CmLEU2}$     | This study                             |
| JCP_942  | SN250  | $\frac{ura3\Delta::\lambda imm434::URA3-IRO1}{ura3\Delta::\lambda imm434} \frac{arg4::hisG\ his1::hisG\ leu2::hisG::CdHIS1\ ZCF8-13xMYC}{arg4::hisG\ his1::hisG\ leu2::hisG::CmLEU2\ zcf8\Delta}$ | This study                             |
| JCP_520  | SC5314 |                                                                                                                                                                                                   | Gillum <i>et al.</i> , 1984            |
| JCP_1072 | SC5314 | $\frac{TDH3p-YFP-ZCF8}{zcf8\Delta}$                                                                                                                                                               | This study                             |
| JCP_1102 | SC5314 | $\frac{zcf8\Delta}{zcf8\Delta}$                                                                                                                                                                   | This study                             |
| JCP_1139 | SC5314 | $\frac{C_{13130C}-mNeonGreen}{C_{13130C}}$                                                                                                                                                        | This study                             |
| JCP_1140 | SC5314 | $\frac{DAL52-mNeonGreen}{DAL52}$                                                                                                                                                                  | This study                             |

## References

- Gillum, A. M., Tsay, E. Y. H., & Kirsch, D. R. 1984. Isolation of the *Candida albicans* gene for orotidine-5'-phosphate decarboxylase by complementation of *S. cerevisiae* *ura3* and *E. coli* *pyrF* mutations. *Mol Gen Genet* 198:179–182.
- Homann, O. R., Dea, J., Noble, S. M., & Johnson, A. D. 2009. A phenotypic profile of the *Candida albicans* regulatory network. *PLoS Genet* 5:e1000783.
- Noble, S. M., & Johnson, A. D. 2005. Strains and strategies for large-scale gene deletion studies of the diploid human fungal pathogen *Candida albicans*. *Eukaryot Cell* 4:298–309.
