# Supplementary material for: A Fungal Transcription Regulator of Vacuolar Function Modulates Candida albicans Interactions with Host Epithelial Cells
Source: PubMed Central journal article supplement (PMC8593675; doi:10.1128/mbio.03020-21), 2021-11-16
Supplement: mbio.03020-21-st005.pdf [file mbio.03020-21-st005.pdf]

**Table S5.** Oligos used in this study.

| Number                                                                                | Description                    | Sequence (5' - 3')                                                                                 |
|---------------------------------------------------------------------------------------|--------------------------------|----------------------------------------------------------------------------------------------------|
| <i>ZCF8</i> deletion using pSFS2a                                                     |                                |                                                                                                    |
| JCP_2162                                                                              | KpnI upstream <i>ZCF8</i> F    | AGACTTGGTACCCGTGGCTGTATTGATGGATTGT                                                                 |
| JCP_2163                                                                              | XhoI upstream <i>ZCF8</i> R    | AGATTACTCGAGAGAAGTTTGTGGCTGTTGGA                                                                   |
| JCP_2164                                                                              | NotI downstream <i>ZCF8</i> F  | AGACGCGGCCGCTGCAAGATCAAACCCCTTAGTCT                                                                |
| JCP_2165                                                                              | SacII downstream <i>ZCF8</i> R | AGCTAGCCGCGGACGAGTGTGTGTTGAAAGGT                                                                   |
| <i>ZCF8</i> ectopic expression (inserting <i>TDH3</i> promoter upstream <i>ZCF8</i> ) |                                |                                                                                                    |
| JCP_1563                                                                              | pCJN542 F                      | TTTCTTATATATATATTTTCTATTTAATTTAT<br>ACTGGAATACATCAAGATTGATTGGAGATTGAATT<br>GGCATCAAGCTTGCCTCGTCCCC |
| JCP_1478                                                                              | pCJN542 R                      | GAATAATTCCTTCACCTTTAGACATATTTGAATTC<br>AATGTGATG                                                   |
| JCP_1479                                                                              | pAJ2181 YFP F                  | ATGTCTAAAGGTGAAGAATTATTC                                                                           |
| JCP_1564                                                                              | pAJ2181 YFP R                  | GGGTAGCACTCGATGAAGGTGAAGATGGTGAAGGCGAAG<br>GTGATTCAGTATTAGATAGATTACTTTCCATATTTG<br>AATCAATTGTGATG  |
| Substitution of <i>ZCF8</i> by <i>YFP</i> and <i>ZCF8</i> deletion                    |                                |                                                                                                    |
| JCP_1913                                                                              | pAJ2182 YFP F                  | TATTTACTTTTCAATTCTTCCTTCTTTTCCCTGTCA<br>AACTACATTCAACCTTAATTTTCATTTCAA<br>ATATGTCTAAAGGTGAATTATTC  |
| JCP_1387                                                                              | pAJ2182 YFP R                  | CAAAACCAGATTTCCAGATTTCCAGTTATTTGTACAATTCATCCATACC                                                  |
| JCP_1388                                                                              | pMBL179 SAT1 F                 | CTGGAAATCTGGAAATCTGGTTTTG                                                                          |
| JCP_1914                                                                              | pMBL179 SAT1 R                 | AATGATATTAACACTATTTCTATCTATCTATATATA<br>TATCAATACAATTACCCATATGTTTCCCAAATTA<br>GGCGTCATCCTGTGCTCCCC |
| JCP_2172                                                                              | <i>ZCF8</i> del F              | CGTGGCTGTATTGATGGATTGT                                                                             |
| JCP_2175                                                                              | <i>ZCF8</i> del R              | ACGAGTGTGTGTTGAAAGGT                                                                               |
| C-terminal tagging of <i>ZCF8</i> with 13xMyc                                         |                                |                                                                                                    |
| JCP_1569                                                                              | pADH34 13xMyc F                | ATTTAAATTTGATGAAAATGTCGTTAATGAATATTT<br>CAAACATGTGTGTAACCAAATATCTTTGAACG<br>GATCCCCGGGTTAATTAACGG  |
| JCP_1570                                                                              | pADH34 13xMyc R                | TGATATTAACACTATTTCTATCTATCTATATATATATCAA<br>TACAAATTTACCCATATGTTTCCCAAAGCGGCCG<br>CTCTAGAAGTGTGATC |
| Tagging <i>CI_13130C</i> and <i>DAL52</i> with mNeonGreen                             |                                |                                                                                                    |
| JCP_2981                                                                              | <i>C1_13130C</i> KpnI F        | ATATGGTACCCTATTGGTGGAGATTATGGAG                                                                    |
| JCP_2982                                                                              | <i>C1_13130C</i> mNG R         | CCTTTAGAAACCATACCCTACCACCGCACCAGAAATTGACAAATC                                                      |
| JCP_2983                                                                              | <i>CI_13130C</i> pRB895 mNG F  | GATTTGTCAATTTCTGGTGCGGTGGTAGTGGTATGGTTTCTAAAGG                                                     |
| JCP_2980                                                                              | pRB895 mNG XhoI R              | ATTACTCGAGCTATTTATACAATTCATCCATACC                                                                 |
| JCP_2984                                                                              | <i>CI_13130C</i> NotI F        | TAATGCGGCGCCATGATAAGAAATTTGTACG                                                                    |
| JCP_2985                                                                              | <i>CI_13130C</i> SacII R       | TTATCCGCGGGTGTGTCTCTTTGTTCTG                                                                       |
| JCP_2986                                                                              | <i>DAL52</i> KpnI F            | TATAGGTACCTGTTTCTTCAAATGTTGC                                                                       |
| JCP_2987                                                                              | <i>DAL52</i> mNG R             | CCTTTAGAAACCATACCCTACCACCGAGACTATATCTA<br>AAATCAAATTTTC                                            |
| JCP_2988                                                                              | <i>DAL52</i> pRB895 mNG F      | GAAAATTTGAATTTTAGATATAGTCTCGGTGGTAGTGGTAT<br>GGTTCTAAAGG                                           |
| JCP_2989                                                                              | <i>DAL52</i> NotI F            | ATATGCGGCCGATGAGATGATGAGTTATGTTG                                                                   |

JCP\_2990

*DAL52* SacII R

TTTACCGCGGTGGATACAGATATTGATTCC

---

Inserting *ZCF8* DNA binding domain sequence into pLIC-H3

---

JCP\_2024

*Sma*I *ZCF8* DBD F

AGCAGCCCCGGGACAACAAAACCTAAACGTCAAAG

JCP\_2026

*Xho*I *ZCF8* DBD R

GTGGTGCTCGAGTTACTTTTCATAATCTTCGAAGTAG

---
