# Supplementary material for: A Fungal Transcription Regulator of Vacuolar Function Modulates Candida albicans Interactions with Host Epithelial Cells
Source: PubMed Central journal article supplement (PMC8593675; doi:10.1128/mbio.03020-21), 2021-11-16
Supplement: mbio.03020-21-st006.pdf [file mbio.03020-21-st006.pdf]

**Table S6.** Plasmids used in this study.

| Number   | Name                                                                 | Description                                                                                  | Reference                         |
|----------|----------------------------------------------------------------------|----------------------------------------------------------------------------------------------|-----------------------------------|
| JCP_054  | pCJN542                                                              | source of <i>C. albicans</i> <i>TDH3</i> promoter                                            | Nobile <i>et al.</i> , 2008       |
| JCP_002  | pSFS2a                                                               | <i>SAT1</i> -flipper                                                                         | Reuss <i>et al.</i> , 2004        |
| JCP_1118 | pRB895                                                               | source of <i>C. albicans</i> optimized mNeonGreen                                            | Fraser <i>et al.</i> , 2019       |
| JCP_129  | pMBL179                                                              | source of <i>NAT1</i> coding sequence                                                        | Dalal <i>et al.</i> , 2016        |
| JCP_182  | pAJ2182                                                              | source of <i>C. albicans</i> optimized YFP                                                   | Gerami-Nejad <i>et al.</i> , 2012 |
| JCP_080  | pADH34                                                               | source of <i>C. albicans</i> optimized 13xMYC tag                                            | Hernday <i>et al.</i> , 2010      |
| JCP_233  | pLIC-H3                                                              | produce recombinant N-terminal 6-His tagged proteins in <i>E. coli</i> , upon IPTG-induction | Cain <i>et al.</i> , 2012         |
| JCP_809  | pLIC-H3- <i>ZCF8</i> (DBD)                                           | recombinant 6His-Zcf8p (DBD) production                                                      | This study                        |
| JCP_938  | pSFS2a + upstream <i>ZCF8</i> + downstream <i>ZCF8</i>               | used to replace <i>ZCF8</i> with <i>SAT1</i> flip recombinase cassette                       | This study                        |
| JCP_1132 | pSFS2a + <i>DAL52</i> -mNeonGreen + downstream <i>DAL52</i>          | used to tag <i>DAL52</i> with C-terminal mNeonGreen                                          | This study                        |
| JCP_1133 | pSFS2a + <i>CI_13130C</i> - mNeonGreen + downstream <i>CI_13130C</i> | used to tag <i>CI_13130C</i> with C-terminal mNeonGreen                                      | This study                        |

## References

- Cain, C. W., Lohse, M. B., Homann, O. R., Sil, A., & Johnson, A. D. 2012. A conserved transcriptional regulator governs fungal morphology in widely diverged species. *Genetics* 190:511–521.
- Dalal, C. K., Zuleta, I. A., Mitchell, K. F., Andes, D. R., El-Samad, H., & Johnson, A. D. 2016. Transcriptional rewiring over evolutionary timescales changes quantitative and qualitative properties of gene expression. *eLife* 5:e18981.
- Frazer, C., Hernday, A. D., & Bennett, R. J. 2019. Monitoring Phenotypic Switching in *Candida albicans* and the Use of Next-Gen Fluorescence Reporters. *Curr Protoc Microbiol* 53:1–27.
- Gerami-Nejad, M., Forche, A., McClellan, M., & Berman, J. 2012. Analysis of protein function in clinical *C. albicans* isolates. *Yeast*, 29:303–309.
- Hernday, A. D., Noble, S. M., Mitrovich, Q. M., & Johnson, A. D. 2010. Genetics and molecular biology in *Candida albicans*. *Methods Enzymol* 470:737–758.
- Nobile CJ, Solis N, Myers CL, Fay AJ, Deneault JS, Nantel A, Mitchell AP, Filler SG. 2008. *Candida albicans* transcription factor Rim101 mediates pathogenic interactions through cell wall functions. *Cell Microbiol* 10:2180–2196.
- Reuß, O., Vik, Å., Kolter, R., & Morschhäuser, J. 2004. The *SAT1* flipper, an optimized tool for gene disruption in *Candida albicans*. *Gene* 341:119–127.
